# Supplementary material for: A peptide-based pH-sensitive antibacterial hydrogel for healing drug-resistant biofilm-infected diabetic wounds
Source: Royal Society of Chemistry journal article supplement (doi:10.1039/d4tb00594e), 2024-01-01
Supplement: d4tb00594e1.pdf [file d4tb00594e1.pdf]

## Supporting information

# Peptide-based pH-sensitive Antibacterial Hydrogel for Drug-resistant Biofilm-infected Diabetic Wounds Healing

Duoyang Fan,<sup>a, b</sup> Ruyan Xie,<sup>a, b</sup> Xiaohui Liu,<sup>a, b</sup> Haohan Li,<sup>a, b</sup> Ziheng Luo,<sup>a, b</sup> Yanbing Li,<sup>c</sup> Fei Chen,<sup>\*a, b</sup> and Wenbin Zeng<sup>\*a, b</sup>

<sup>a</sup> Xiangya School of Pharmaceutical Sciences, Central South University, Changsha, 410013, PR China.

<sup>b</sup> Hunan Key Laboratory of Diagnostic and Therapeutic Drug Research for Chronic Diseases, Central South University, Changsha, 410013, PR China.

<sup>c</sup> Xiangya Hospital of Central South University, Changsha, PR China.

**Table S1.** Composition and nomenclature of hydrogels.

| Sample                         | C <sub>TPI-PN</sub> (mg/mL) |
|--------------------------------|-----------------------------|
| QCS-OD                         | 0                           |
| QCS-OD-AMP (COA-T0)            | 0                           |
| QCS-OD-AMP/TPI-PN0.05 (COA-T1) | 0.05                        |
| QCS-OD-AMP/TPI-PN0.10 (COA-T2) | 0.10                        |
| QCS-OD-AMP/TPI-PN0.15 (COA-T3) | 0.15                        |
| QCS-OD-AMP/TPI-PN0.20 (COA-T4) | 0.20                        |
| QCS-OD-AMP/TPI-PN0.25 (COA-T5) | 0.25                        |

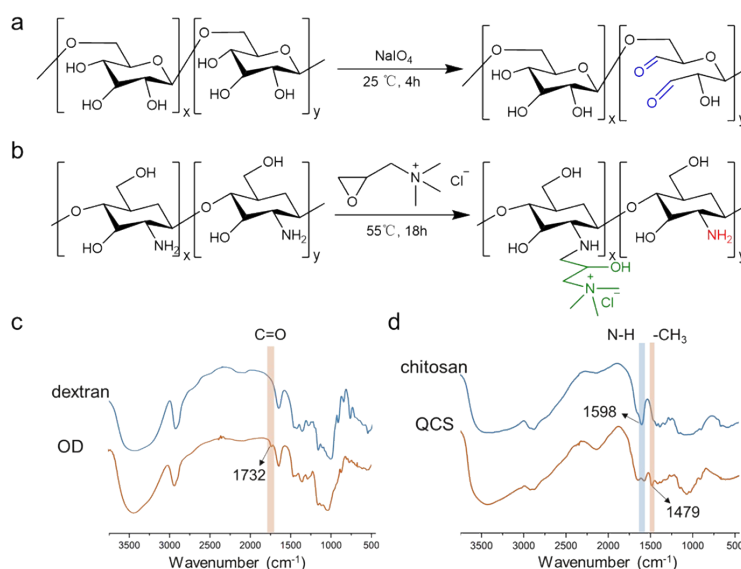

**Figure S1.** Synthesis and FT-IR characterization of ODex and QCS. (a) Synthesis of ODex; (b) synthesis of QCS; (c) FT-IR spectra of dextran and ODex; (D) FT-IR spectra of chitosan and QCS.

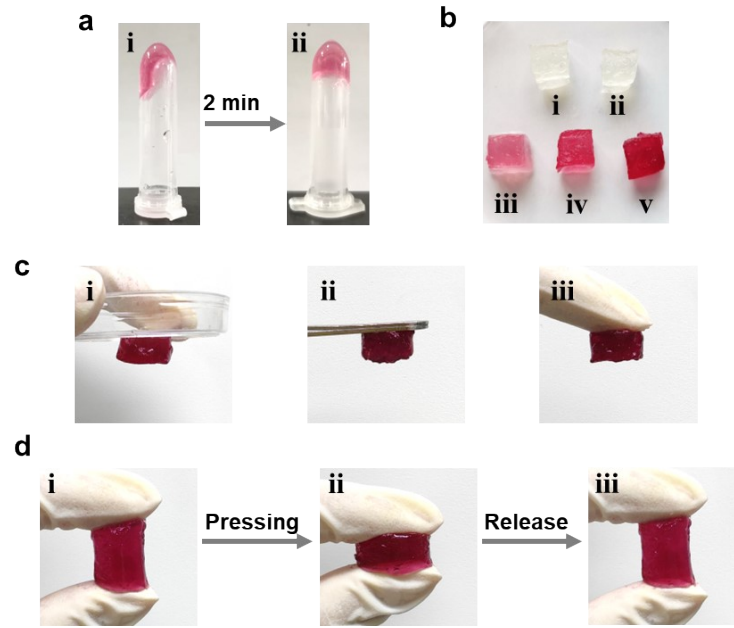

**Figure S2.** (a) COA-T3 before and after gelation. (b) Photographs of the hydrogels: (i) QCS-OD, (ii) COA-T0, (iii) COA-T1, (iv) COA-T2, (v) COA-T3. (c) Photographs of the adhesiveness of COA-T3 to different materials. (d) Original state (i), compressed state (ii), and the recovered state (iii) of the prepared hydrogel.

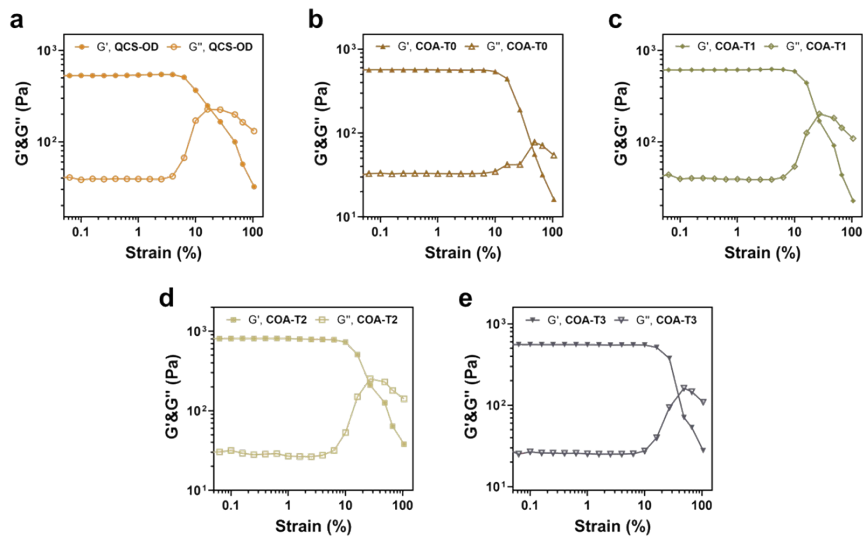

**Figure S3.** Amplitude scanning assay of QCS-OD (a), COA-T0 (b), COA-T1 (c), COA-T2 (d), COA-T3 (e).

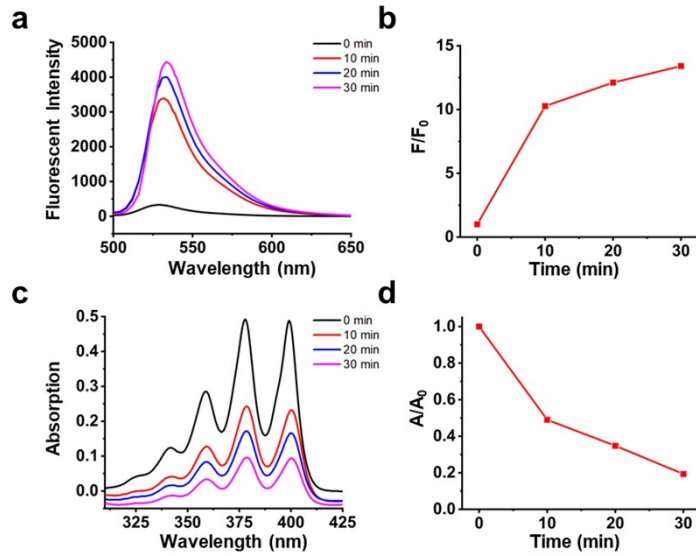

**Figure S4.** Investigation of ROS generation of **COA-T3**. (a) The fluorescence emission spectrum of DCFH with excitation wavelength of 488nm under different illumination time in the presence of **COA-T3**. (b) The fluorescence emission intensity of DCFH at 525nm increased gradually with the prolongation of illumination time. (c) The UV-vis absorption spectrum of ABDA under different illumination time in the presence of **COA-T3**. (d) The absorption value of ABDA at 378nm decreased with the prolongation of light time.

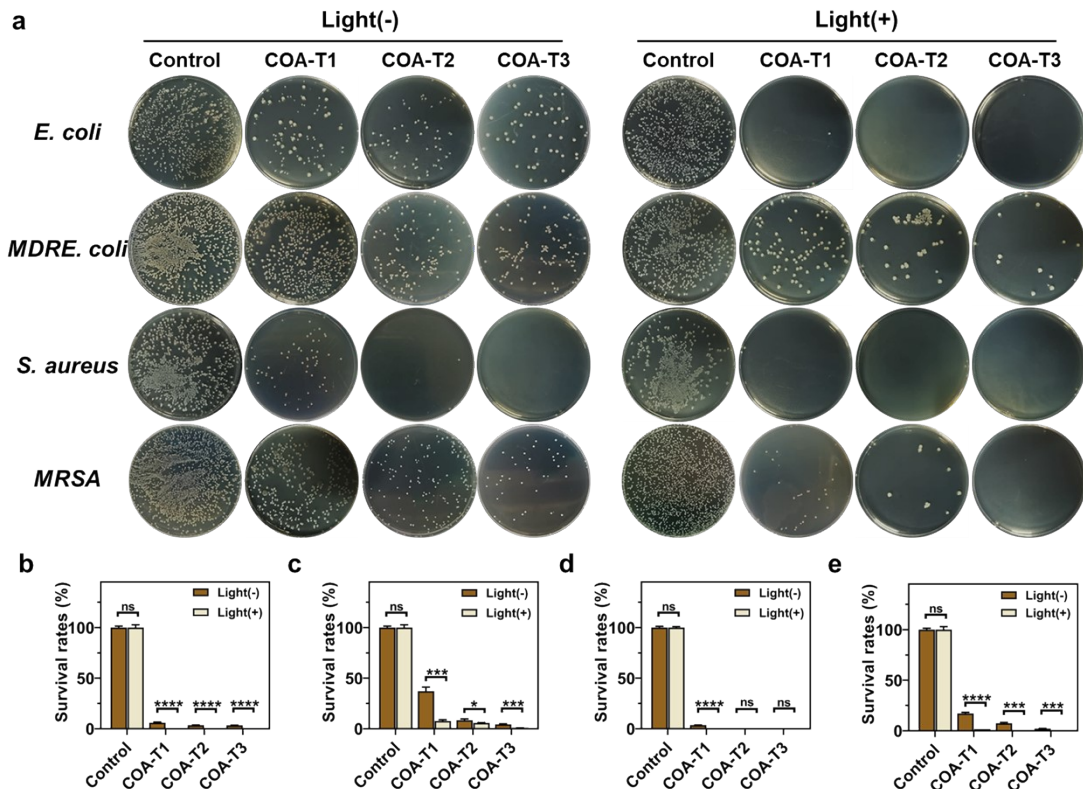

**Figure S5.** Effect of different concentration of photosensitizer in hydrogels on its antibacterial activity. (a) The colony growth of *E.coli*, *MDRE.coli*, *S.aureus* and *MRSA* on agar plates after hydrogels treatment with different concentrations of photosensitizer with or without light irradiation. The survival rates of *E.coli* (b), *MDRE.coli* (c), *S.aureus* (d) and *MRSA* (e) in hydrogels with different concentrations of photosensitizers were quantified by counting the colonies on agar plates. The data is displayed as the mean  $\pm$ SD (n = 3). \*\*\*\* $P < 0.0001$ ; \*\*\* $P < 0.001$ ; \*\* $P < 0.01$ ; “ns” represents no significant difference between the two groups.

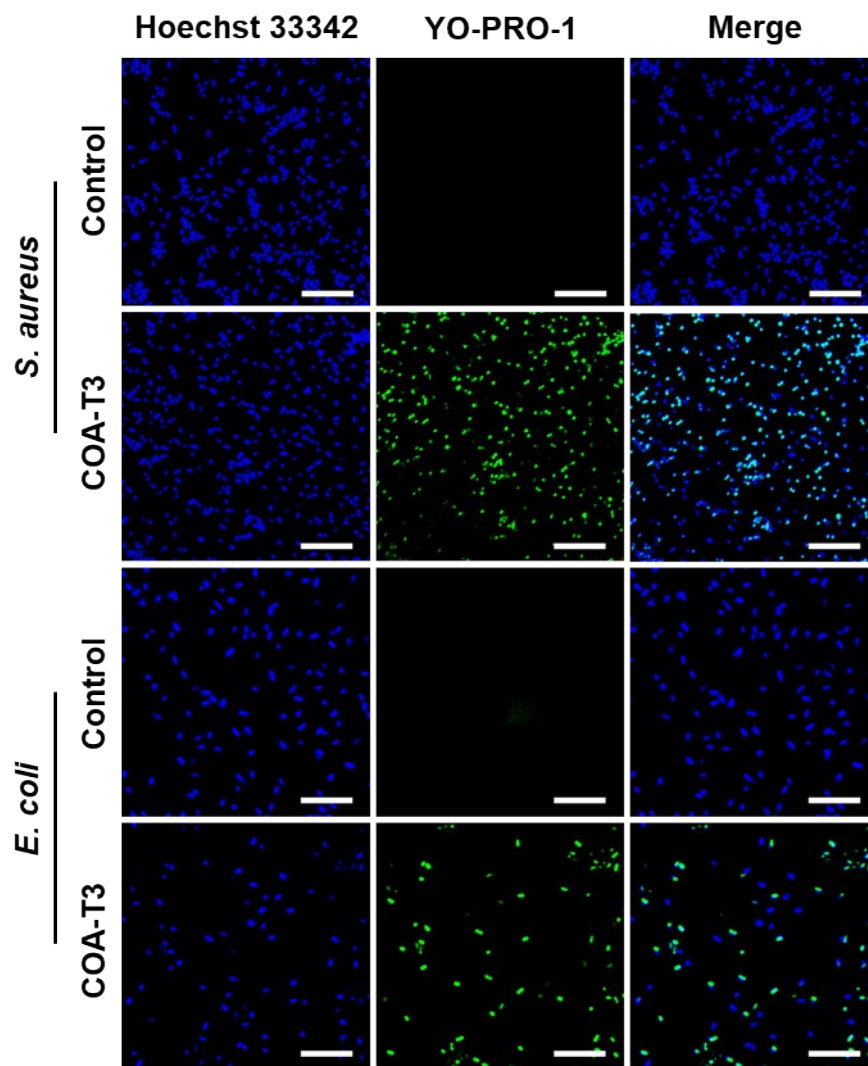

**Figure S6.** CLSM images of *S. aureus* and *E. coli* after incubation with PBS (Control) or COA-T3 and then co-staining with Hoechst 33342 (blue fluorescence, a nucleic acid dye for all bacteria) and YO-PRO-1 (green fluorescence, a dye for dead bacteria). Scale bar: 10  $\mu$ m.

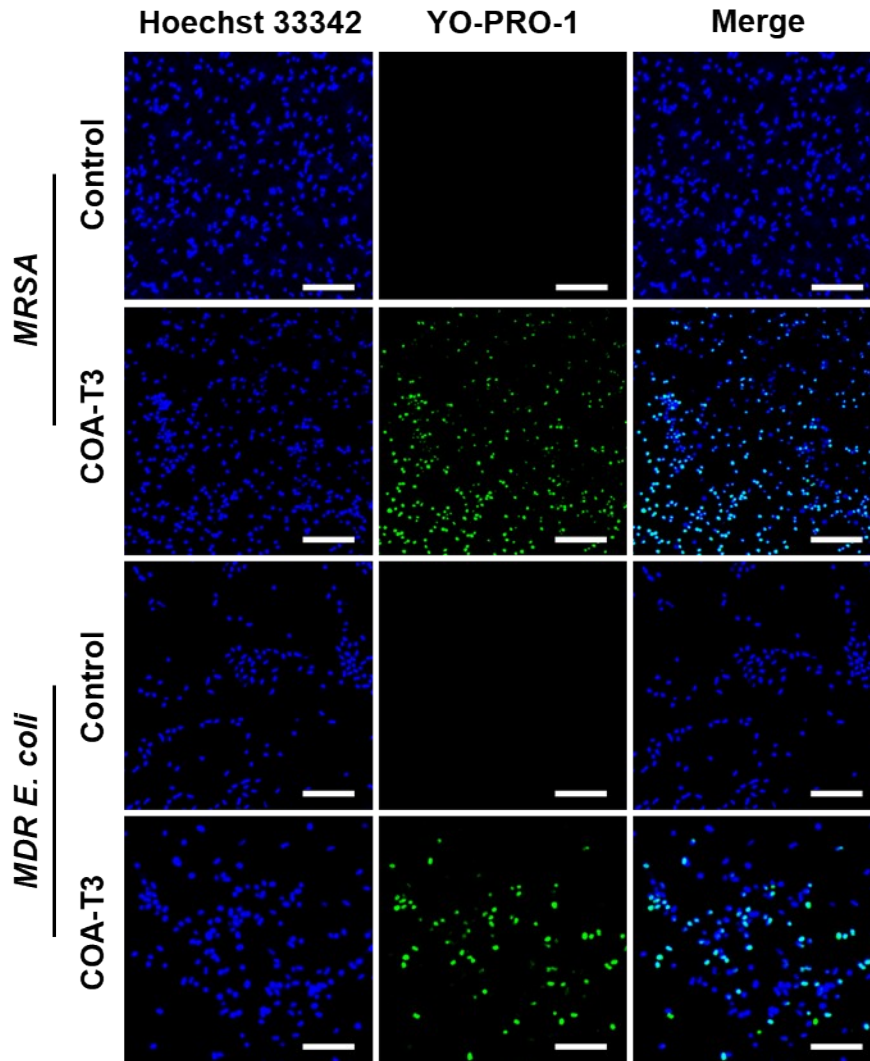

**Figure S7.** CLSM images of *MRSA* and *MDR E. coli* after incubation with PBS (Control) or **COA-T3** and then co-staining with Hoechst 33342 (blue fluorescence, a nucleic acid dye for all bacteria) and YO-PRO-1 (green fluorescence, a dye for dead bacteria). Scale bar: 10  $\mu\text{m}$ .

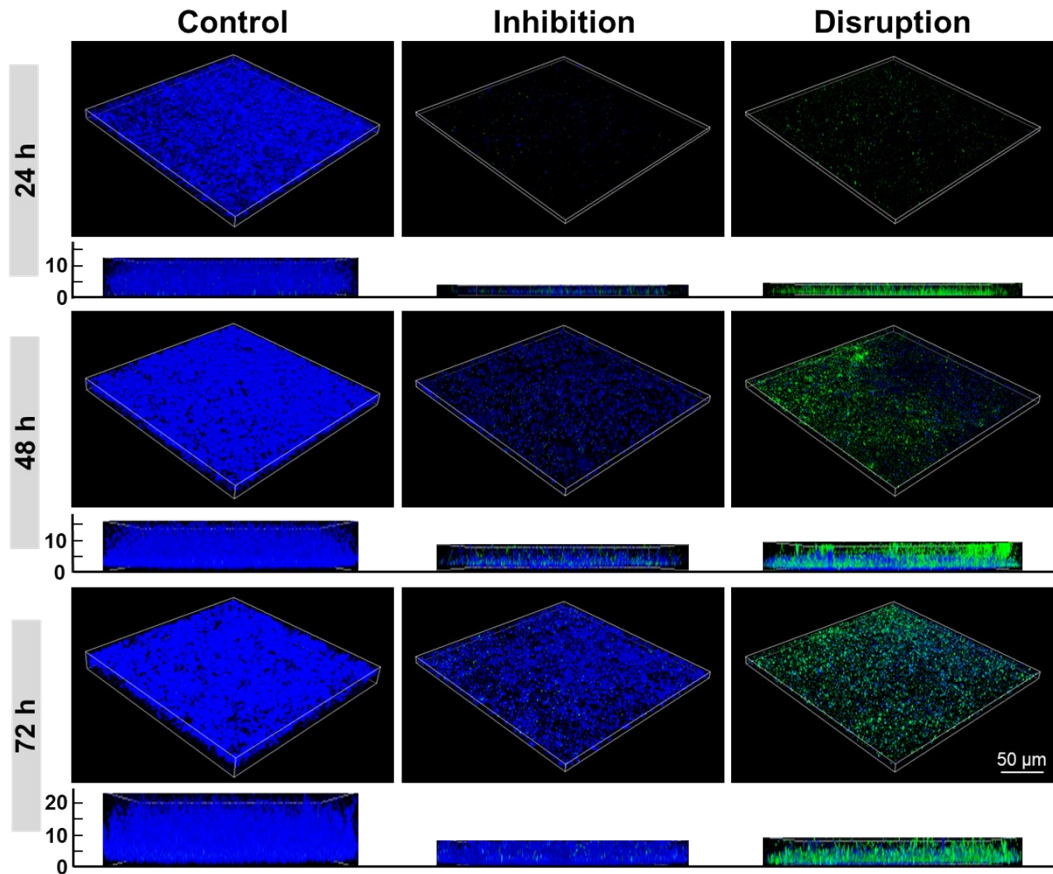

**Figure S8.** Anti-biofilm assays. CLSM 3D and side view imaging of *MRSA*-biofilms co-incubation with PBS or **COA-T3** before and after biofilm formation. The samples were co-staining with Hoechst 33342 (blue fluorescence) and YO-PRO-1 (green fluorescence) before CLSM imaging. Scale bars: 50 μm.

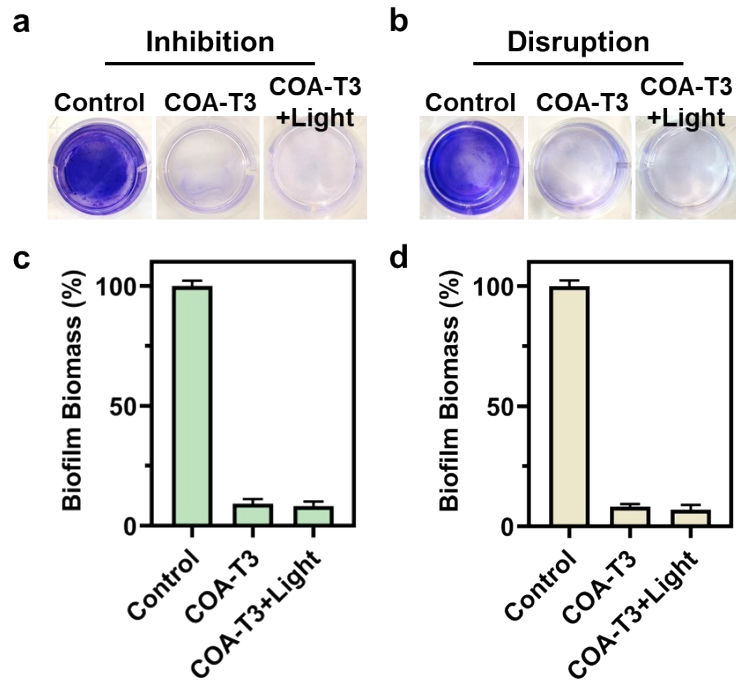

**Figure S9.** Investigation of biofilm (24 h) inhibition/disruption *via* crystal violet staining method. (a-b) Images of *MRSA* stained by crystal violet after different treatments. (c-d) Biofilm biomass of *MRSA* after different treatments.

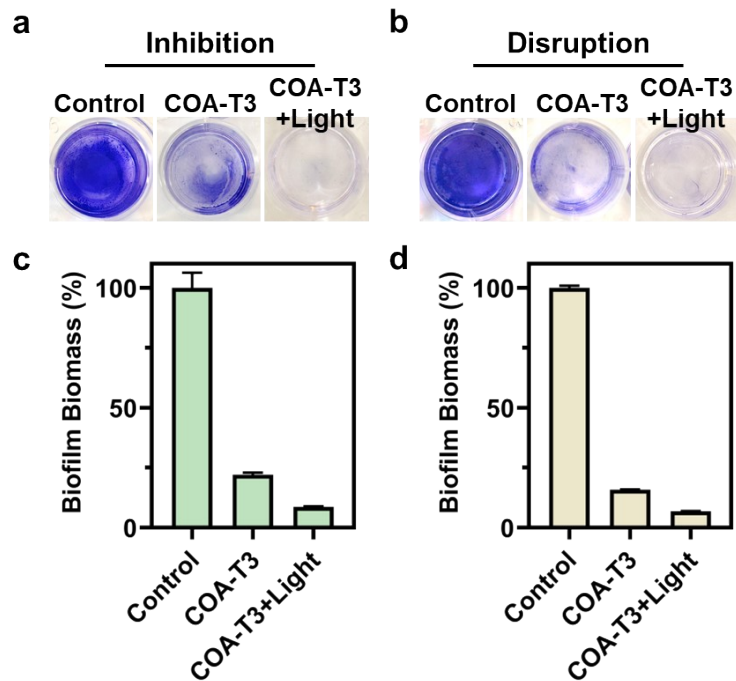

**Figure S10.** Investigation of biofilm (48 h) inhibition/disruption *via* crystal violet staining method. (a-b) Images of *MRSA* stained by crystal violet after different

treatments. (c-d) Biofilm biomass of *MRSA* after different treatments.

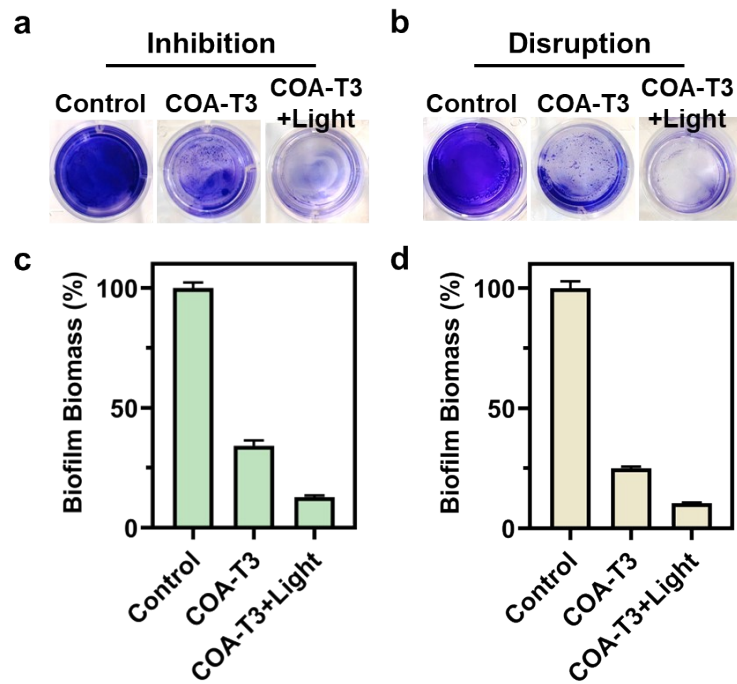

**Figure S11.** Investigation of biofilm (72 h) inhibition/disruption *via* crystal violet staining method. (a-b) Images of *MRSA* stained by crystal violet after different treatments. (c-d) Biofilm biomass of *MRSA* after different treatments.



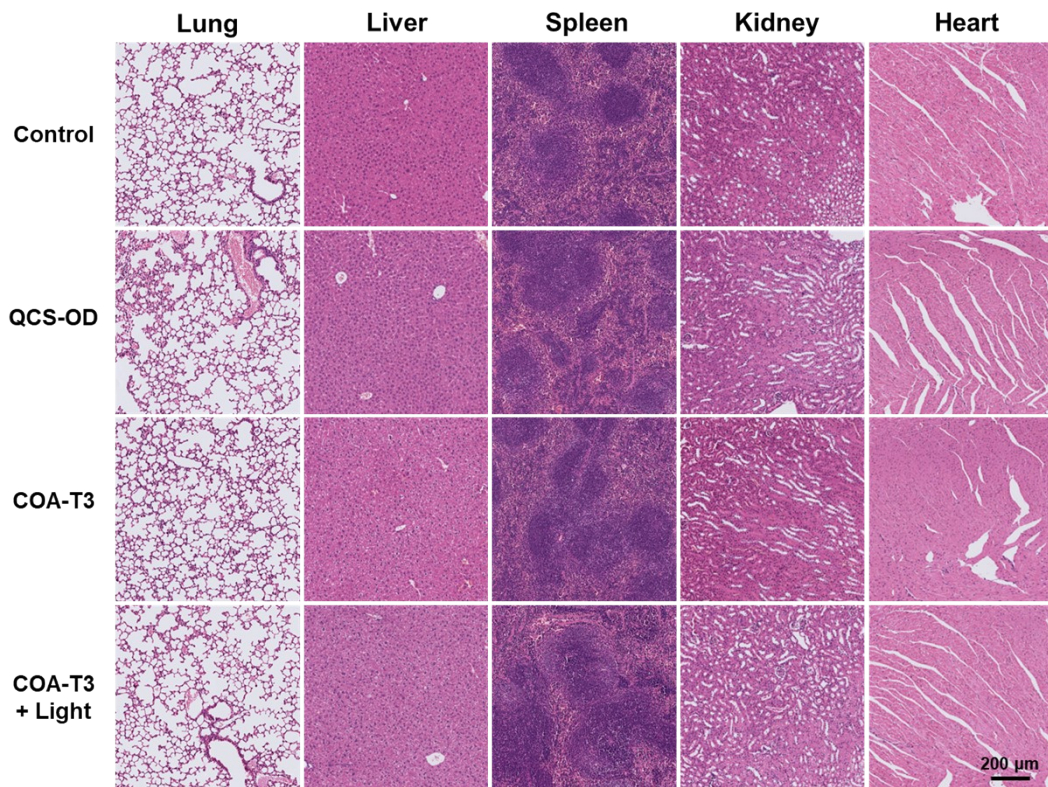

**Figure S12.** Representative images of H&E-stained heart, liver, spleen, lung and kidney slices from mice 8 days post treatment at each group. Scale bar: 200  $\mu\text{m}$ .
